# Supplementary material for: Brain tumor with an ATXN1-NUTM1 fusion gene expands the histologic spectrum of NUTM1-rearranged neoplasia
Source: Acta Neuropathol Commun. 2019 Dec 30;7:220. doi: 10.1186/s40478-019-0870-8 (PMC6937844; doi:10.1186/s40478-019-0870-8)
Supplement: Supplementary file 1 — Additional file 1: Table S1. Results of the Heidelberg DNA methylation-based CNS tumor classifier (entities and scores). [file 40478_2019_870_MOESM1_ESM.xlsx]

## Sheet: Feuil1
Methylation class	Name	Calibrated score
EFT, CIC	methylation class CNS Ewing sarcoma family tumor with CIC alteration	0.235
MNG	methylation class meningioma	0.101
MB, G3	methylation class medulloblastoma, subclass group 3	0.036
PXA	methylation class (anaplastic) pleomorphic xanthoastrocytoma	0.032
PLEX, PED B	methylation class plexus tumor, subclass pediatric B	0.03
PLEX, PED A	methylation class plexus tumor, subclass pediatric A	0.03
CONTR, INFLAM	methylation class control tissue, inflammatory tumor microenvironment	0.03
ENB, A	methylation class esthesioneuroblastoma, subclass A	0.026
DMG, K27	methylation class diffuse midline glioma H3 K27M mutant	0.026
LGG, DIG/DIA	methylation class low grade glioma, desmoplastic infantile astrocytoma / ganglioglioma	0.023
LGG, PA PF	methylation class low grade glioma, subclass posterior fossa pilocytic astrocytoma	0.02
CPH, PAP	methylation class craniopharyngioma, papillary	0.019
CONTR, REACT	methylation class control tissue, reactive tumor microenvironment	0.019
GBM, MES	methylation class glioblastoma, IDH wildtype, subclass mesenchymal	0.018
HMB	methylation class hemangioblastoma	0.015
PITUI, SCO, GCT	methylation class pituicytoma / granular cell tumor / spindle cell oncocytoma	0.014
A IDH, HG	methylation class IDH glioma, subclass high grade astrocytoma	0.014
ATRT, MYC	methylation class atypical teratoid/rhabdoid tumor, subclass MYC	0.013
MB, SHH CHL AD	methylation class medulloblastoma, subclass SHH A (children and adult)	0.012
EPN, RELA	methylation class ependymoma, RELA fusion	0.012
LGG, PA/GG ST	methylation class low grade glioma, subclass hemispheric pilocytic astrocytoma and ganglioglioma	0.011
CHORDM	methylation class chordoma	0.011
SCHW	methylation class schwannoma	0.009
ETMR	methylation class embryonal tumor with multilayered rosettes	0.009
EPN, PF A	methylation class ependymoma, posterior fossa group A	0.009
MB, WNT	methylation class medulloblastoma, WNT	0.008
LGG, PA MID	methylation class low grade glioma, subclass midline pilocytic astrocytoma	0.007
CONTR, HEMI	methylation class control tissue, hemispheric cortex	0.007
SUBEPN, PF	methylation class subependymoma, posterior fossa	0.006
LGG, SEGA	methylation class low grade glioma, subependymal giant cell astrocytoma	0.006
GBM, G34	methylation class glioblastoma, IDH wildtype, H3.3 G34 mutant	0.006
EWS	methylation class Ewing sarcoma	0.006
EPN, PF B	methylation class ependymoma, posterior fossa group B	0.006
CNS NB, FOXR2	methylation class CNS neuroblastoma with FOXR2 activation	0.006
SFT HMPC	methylation class solitary fibrous tumor / hemangiopericytoma	0.005
MELAN	methylation class melanoma	0.005
MB, G4	methylation class medulloblastoma, subclass group 4	0.005
LGG, DNT	methylation class low grade glioma, dysembryoplastic neuroepithelial tumor	0.005
HGNET, MN1	methylation class CNS high grade neuroepithelial tumor with MN1 alteration	0.005
GBM, RTK I	methylation class glioblastoma, IDH wildtype, subclass RTK I	0.005
GBM, MID	methylation class glioblastoma, IDH wildtype, subclass midline	0.005
EPN, SPINE	methylation class ependymoma, spinal	0.005
CPH, ADM	methylation class craniopharyngioma, adamantinomatous	0.005
CN	methylation class central neurocytoma	0.005
A IDH	methylation class IDH glioma, subclass astrocytoma	0.005
PIN T, PPT	methylation class pineal parenchymal tumor	0.004
O IDH	methylation class IDH glioma, subclass 1p/19q codeleted oligodendroglioma	0.004
LGG, MYB	methylation class low grade glioma, MYB/MYBL1	0.004
LGG, GG	methylation class low grade glioma, ganglioglioma	0.004
HGNET, BCOR	methylation class CNS high grade neuroepithelial tumor with BCOR alteration	0.004
EPN, YAP	methylation class ependymoma, YAP fusion	0.004
EPN, MPE	methylation class ependymoma, myxopapillary	0.004
ATRT, TYR	methylation class atypical teratoid/rhabdoid tumor, subclass TYR	0.004
ANA PA	methylation class anaplastic pilocytic astrocytoma	0.004
SUBEPN, ST	methylation class subependymoma, supratentorial	0.003
SUBEPN, SPINE	methylation class subependymoma, spinal	0.003
RETB	methylation class retinoblastoma	0.003
PTPR, B	methylation class papillary tumor of the pineal region group B	0.003
PTPR, A	methylation class papillary tumor of the pineal region group A	0.003
PLEX, AD	methylation class plexus tumor, subclass adult	0.003
PITAD, FSH LH	methylation class pituitary adenoma, FSH/LH	0.003
PITAD, ACTH	methylation class pituitary adenoma, ACTH	0.003
PIN T, PB B	methylation class pineoblastoma group B	0.003
PGG, nC	methylation class paraganglioma, spinal non-CIMP	0.003
MELCYT	methylation class melanocytoma	0.003
IHG	methylation class infantile hemispheric glioma	0.003
CONTR, ADENOPIT	methylation class control tissue, pituitary gland anterior lobe	0.003
ATRT, SHH	methylation class atypical teratoid/rhabdoid tumor, subclass SHH	0.003
SCHW, MEL	methylation class melanotic schwannoma	0.002
PLASMA	methylation class plasmacytoma	0.002
PITAD, TSH	methylation class pituitary adenoma, TSH	0.002
PITAD, STH SPA	methylation class pituitary adenoma, STH sparsely granulated	0.002
PITAD, STH DNS B	methylation class pituitary adenoma, STH densely granulated, group B	0.002
PITAD, PRL	methylation class pituitary adenoma, prolactin	0.002
LYMPHO	methylation class lymphoma	0.002
LIPN	methylation class cerebellar liponeurocytoma	0.002
LGG, RGNT	methylation class low grade glioma, rosette forming glioneuronal tumor	0.002
DLGNT	methylation class diffuse leptomeningeal glioneuronal tumor	0.002
CONTR, PONS	methylation class control tissue, pons	0.002
CONTR, PINEAL	methylation class control tissue, pineal gland	0.002
CONTR, CEBM	methylation class control tissue, cerebellar hemisphere	0.002
CHGL	methylation class chordoid glioma of the third ventricle	0.002
PITAD, STH DNS A	methylation class pituitary adenoma, STH densely granulated, group A	0.001
PIN T, PB A	methylation class pineoblastoma group A / intracranial retinoblastoma	0.001
MB, SHH INF	methylation class medulloblastoma, subclass SHH B (infant)	0.001
GBM, RTK III	methylation class glioblastoma, IDH wildtype, subclass RTK III	0.001
GBM, RTK II	methylation class glioblastoma, IDH wildtype, subclass RTK II	0.001
GBM, MYCN	methylation class glioblastoma, IDH wildtype, subclass MYCN	0.001
ENB, B	methylation class esthesioneuroblastoma, subclass B	0.001
CONTR, WM	methylation class control tissue, white matter	0.001
CONTR, HYPTHAL	methylation class control tissue, hypothalamus	0.001
